# Supplementary material
Source: Springer Nature journal article supplement (https://www.springermedizin.de/resource/supplementary/12890_2012_359_MOESM1_ESM.pdf/9505008)

Difference of Screening and  
Baseline Peak  $\text{VO}_2$  Values

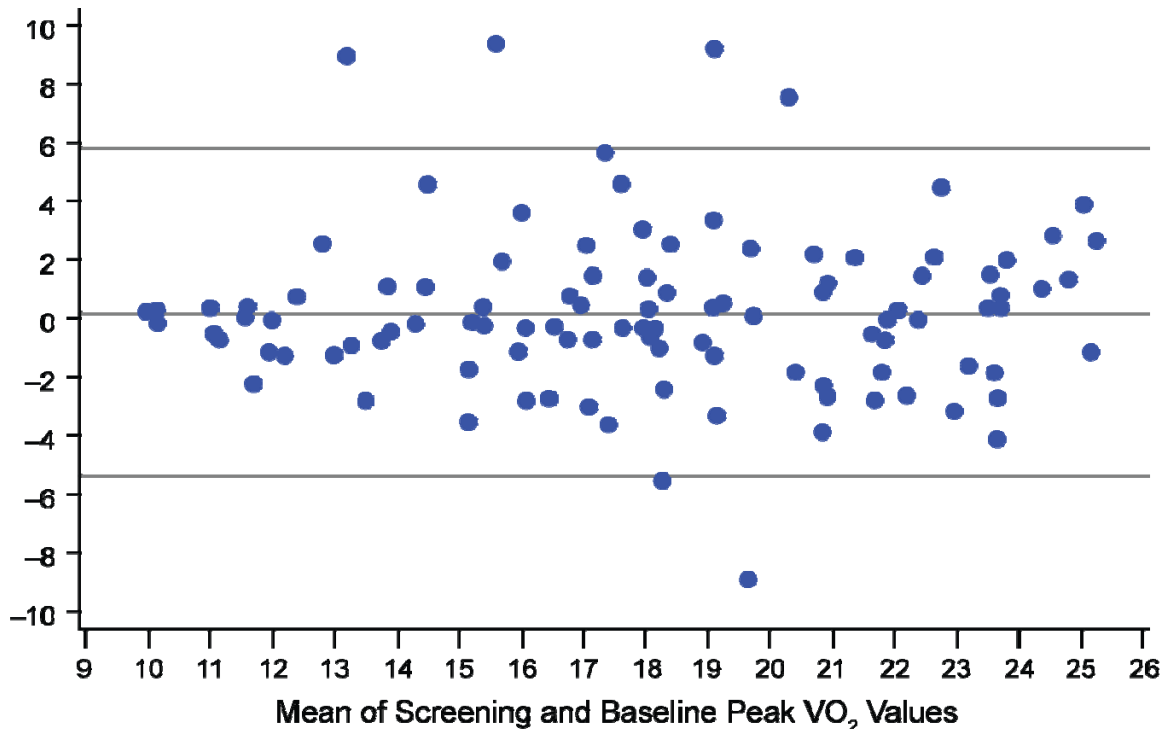

Supplement: MOESM1 [file 9505008]
